# Supplementary material for: Resolving charge-transfer and mass-transfer processes of VO2+/VO2+redox species across the electrode/electrolyte interface using electrochemical impedance spectroscopy for vanadium redox flow battery
Source: Royal Society of Chemistry journal article supplement (doi:10.1039/d0ra05224h), 2020-01-01
Supplement: d0ra05224h1.pdf [file d0ra05224h1.pdf]

## Resolving Charge-transfer and Mass-transfer Processes of $\text{VO}^{2+}/\text{VO}_2^+$ Redox Species Across the Electrode/Electrolyte Interface Using Electrochemical Impedance Spectroscopy for Vanadium Redox Flow Battery

Pradipkumar Leuaa<sup>1</sup>, Divya Priyadarshani<sup>2</sup>, Debitree Choudhury<sup>1</sup>, Rajan Maurya<sup>1</sup>, Manoj  
Neergat<sup>\*,1</sup>

<sup>1</sup>Department of Energy Science and Engineering and <sup>2</sup>Centre for Research in  
Nanotechnology & Science, Indian Institute of Technology Bombay (IITB), Powai, Mumbai  
400076, India

### Supporting Information (SI)

#### 1. Role of constant phase element (CPE)

**Figure S1** shows the EIS of equimolar solution of  $\text{V}^{4+}$  and  $\text{V}^{5+}$  on carbon-modified GCE in 3 M  $\text{H}_2\text{SO}_4$  electrolyte recorded at EP. The fit of the impedance spectrum with pure capacitor is poor (Figure S1(a)). On the other hand, the fit is perfect with a CPE element (Figure S1(b)), instead of capacitor. To account for the distributed behavior of the porous electrode, we have fitted all the data in this manuscript with a constant phase element (CPE).

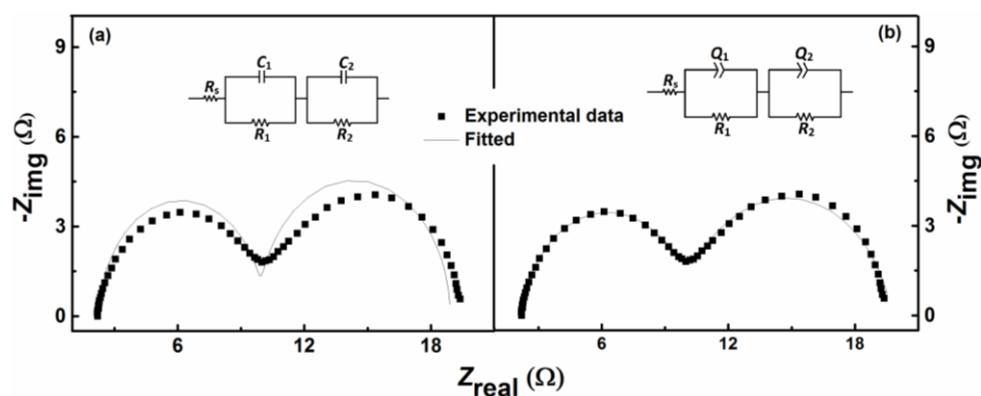

**Figure S1.** EIS of equimolar concentration of  $\text{V}^{4+}$  and  $\text{V}^{5+}$  in 3 M  $\text{H}_2\text{SO}_4$  electrolyte (a) fitted with pure capacitor and (b) fitted with constant phase element (CPE), recorded at EP on carbon-modified GCE at 1600 rpm. Inset to the figures shows the corresponding equivalent circuit.

## 2. F-test for the EC of EIS patterns recorded with 1600 rpm

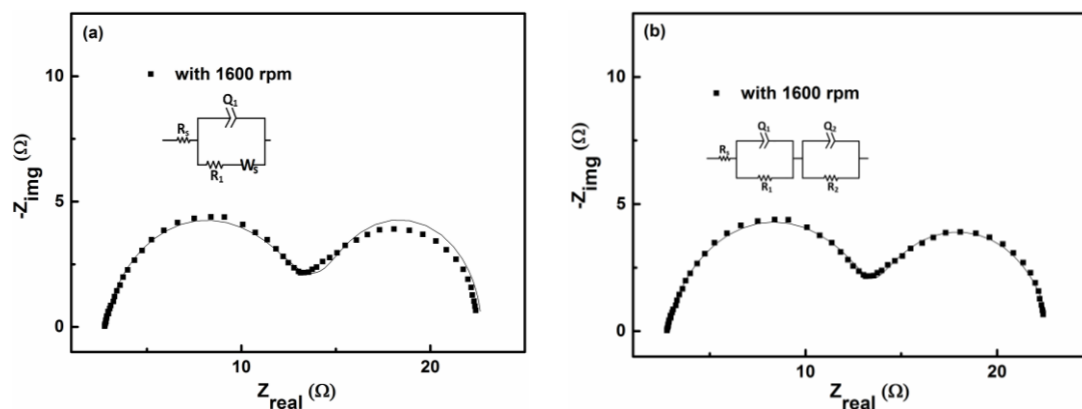

**Figure S2.** EIS pattern recorded at EP on carbon-modified GCE at 1600 rpm in equimolar (0.2 M) concentration of  $\text{VO}^{2+}$  and  $\text{VO}_2^+$  in 3 M  $\text{H}_2\text{SO}_4$  electrolyte. The EC used to fit the data is shown in the insets.

**Table S1.** Parameters obtained by fitting the EIS pattern recorded at EP on carbon-modified GCE at 1600 rpm in equimolar (0.2 M) concentration of  $\text{VO}^{2+}$  and  $\text{VO}_2^+$  in 3 M  $\text{H}_2\text{SO}_4$  electrolyte. The EC used for fitting the data is shown in Figure S2(a).

| Parameter              | Obtained fitting value | rel. std. error (%) | $\chi^2$ (Chi-square) | Relative error of the measured impedance |
|------------------------|------------------------|---------------------|-----------------------|------------------------------------------|
| $R_s$                  | 2.803                  | 0.5486              | 0.0002854             | 1.69                                     |
| $R_{ct}$               | 10.23                  | 0.9321              |                       |                                          |
| $Q_1$ (S-sec $^\phi$ ) | 0.000283               | 4.956               |                       |                                          |
| $\Phi_1$               | 0.8572                 | 0.794               |                       |                                          |
| $W_{s-Y_0}$            | 0.07863                | 2.165               |                       |                                          |
| $W_{s-B}$              | 0.7342                 | 1.859               |                       |                                          |

**Table S2.** Parameters obtained by fitting the EIS pattern recorded at EP on carbon-modified GCE at 1600 rpm in equimolar (0.2 M) concentration of VO<sup>2+</sup> and VO<sub>2</sub><sup>+</sup> in 3 M H<sub>2</sub>SO<sub>4</sub> electrolyte. The EC used for fitting the data is shown in Figure S2(b).

| Parameter                            | Obtained fitting value | rel. std. error (%) | $\chi^2$ (Chi-square) | Relative error of the measured impedance |
|--------------------------------------|------------------------|---------------------|-----------------------|------------------------------------------|
| R <sub>s</sub>                       | 1.789                  | 0.4131              | 0.0001562             | 1.25                                     |
| R <sub>ct</sub>                      | 10.78                  | 0.8809              |                       |                                          |
| Q <sub>1</sub> (S-sec <sup>ϕ</sup> ) | 0.0003297              | 3.688               |                       |                                          |
| Φ <sub>1</sub>                       | 0.8407                 | 0.5785              |                       |                                          |
| R <sub>d</sub>                       | 9.2                    | 1.97                |                       |                                          |
| Q <sub>2</sub> (S-sec <sup>ϕ</sup> ) | 0.00629                | 3.071               |                       |                                          |
| Φ <sub>2</sub>                       | 0.8725                 | 1.95                |                       |                                          |

The EIS patterns recorded at 1600 rpm of the electrode are fitted with a series combination of R<sub>s</sub> and (Q(R<sub>1</sub>W<sub>s</sub>)) element, where W<sub>s</sub> is a finite length transmissive impedance (Warburg short element) placed in series with R<sub>1</sub> (see inset to Figure S2). However, when the LF semi-circle is fitted with (R<sub>2</sub>, Q<sub>2</sub>) element, then the  $\chi^2$  (Chi-square) is lower. The F-test also justifies the fitting of LF semi-circle with (R<sub>2</sub>, Q<sub>2</sub>) element.

Number of degrees of freedom  $\nu = 2N - m$ ,

Where N is the number of frequencies, there are 2N measured impedance values (N real and N imaginary), and m is the number of adjustable parameters used in the model.

N=57 points,

k is the number of parameters added in new model.

F( $\alpha$ , k, 2N-m-k) = 3.929844 (calculated in Excel using the function F.INV.RT)

Where, k=1, m=6 and N=57,  $\alpha = 0.05$

$$F_{exp} = \frac{\frac{s_1 - s_2}{(2N - m) - (2N - m - k)}}{\frac{s_2}{2N - m - k}} = \frac{\frac{s_1 - s_2}{k}}{\frac{s_2}{2N - m - k}}$$

$$S_1 = 1.69, S_2 = 1.25$$

$$F_{exp} = \frac{\frac{1.69 - 1.25}{1}}{\frac{1.25}{107}} = 37.66$$

$$F_{exp} > F(\alpha, k, 2N-m-k)$$

Therefore, the model used in the manuscript (fitting the LF semi-circle with  $(R_2, Q_2)$  element) can be accepted.

### 3. Voltammograms of $V^{4+}$ and $V^{5+}$ containing electrolytes

The voltammograms recorded with 0.2 M  $V^{4+}$  and 0.2 M  $V^{5+}$  electrolytes are shown in **Figure S3**. The voltammograms are reproducible after 20 cycles. The change in the peak currents during the initial 25 cycles of voltammograms is shown as insets to Figure S3(a) and (b).

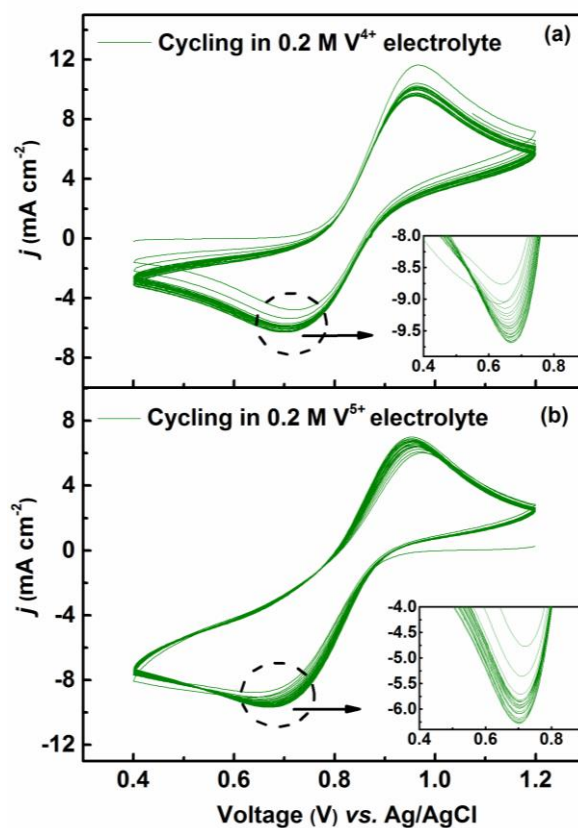

**Figure S3.** Voltammograms of 0.2 M  $V^{4+}$  (a) and 0.2 M  $V^{5+}$  (b) in 3 M  $H_2SO_4$  electrolyte recorded at  $20 \text{ mV s}^{-1}$  scan rate.

#### 4. Change in the OCP with the concentration of the redox species

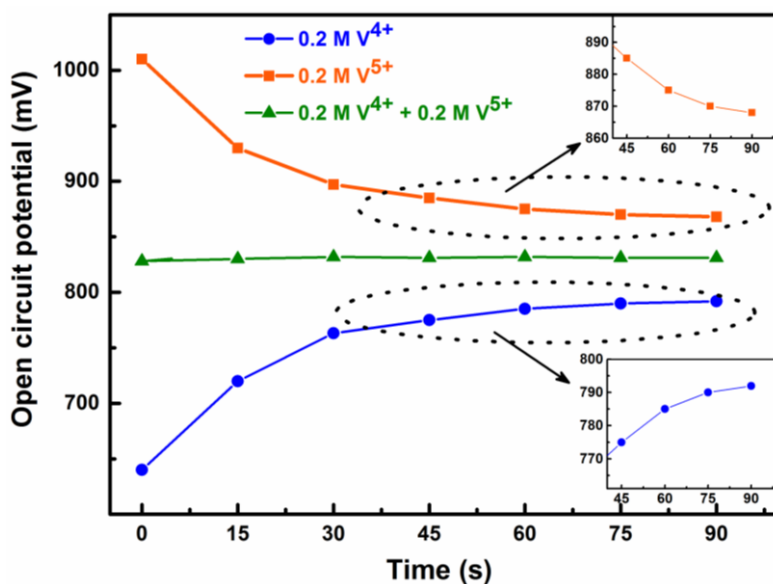

**Figure S4.** Change in measured OCP with the potential holding of working electrode at 0.84 V without rotation in 0.2 M  $V^{4+}$ , 0.2 M  $V^{5+}$  and equimolar (0.2 M) solution of  $V^{4+}$  and  $V^{5+}$  electrolytes.

#### 5. EIS at OCP after potential holding in 0.2 M $V^{5+}$ electrolyte

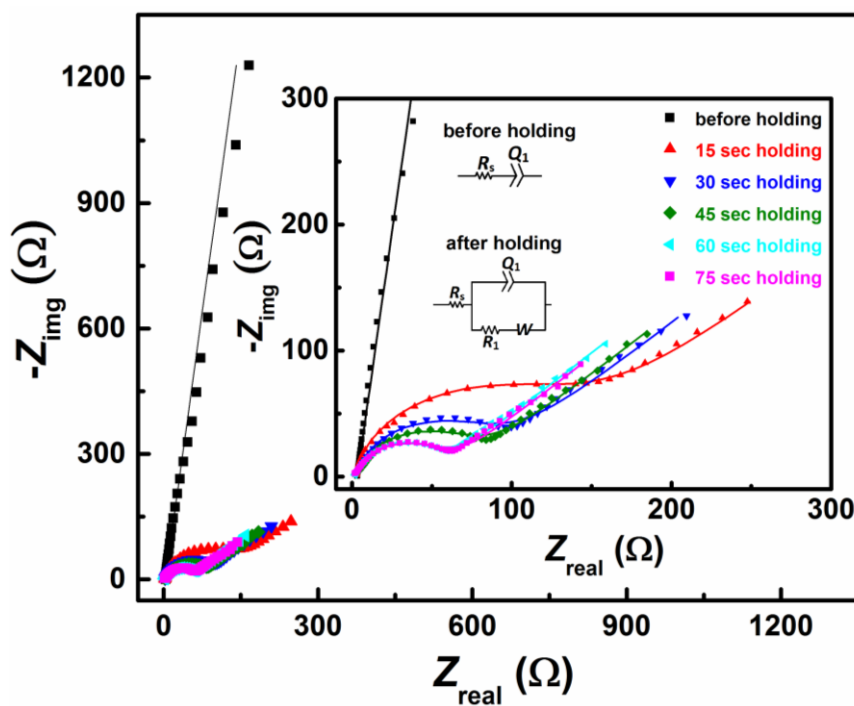

**Figure S5.** EIS patterns recorded at measured OCP on carbon-modified GCE without rotation in 0.2 M  $V^{5+}$  electrolyte after holding the electrode at EP. The symbols and solid

lines show the experimental and the fitted data, respectively. The corresponding EC is shown in the inset.

### 6. Effect of redox species concentration

**Table S3:** Charge-transfer and mass-transfer resistance obtained by fitting the EIS patterns of equimolar solution of  $V^{4+}$  and  $V^{5+}$  in 3 M  $H_2SO_4$  electrolyte.

| Concentration of $V^{4+}$ and $V^{5+}$ (mM) (1:1 ratio) | $R_{ct}$ ( $\Omega$ ) | $C_{dl}$ ( $\mu F$ ) | $R_2$ ( $\Omega$ ) | $C_2$ ( $\mu F$ ) |
|---------------------------------------------------------|-----------------------|----------------------|--------------------|-------------------|
| 25                                                      | 203                   | 485                  | 62                 | 3252              |
| 50                                                      | 77                    | 415                  | 33                 | 3917              |
| 100                                                     | 29                    | 348                  | 19                 | 4828              |
| 200                                                     | 7.8                   | 129                  | 13                 | 6613              |

### 7. Effect of $H_2SO_4$ concentration

**Table S4:** Charge-transfer and mass-transfer resistance obtained by fitting the EIS patterns of equimolar (0.2 M) solution of  $V^{4+}$  and  $V^{5+}$  with different concentrations of  $H_2SO_4$  electrolyte.

| Concentration of $H_2SO_4$ (M) | $R_s$ ( $\Omega$ ) | $R_{ct}$ ( $\Omega$ ) | $C_{dl}$ ( $\mu F$ ) | $R_2$ ( $\Omega$ ) | $C_2$ ( $\mu F$ ) |
|--------------------------------|--------------------|-----------------------|----------------------|--------------------|-------------------|
| 1                              | 2.83               | 60                    | 630                  | 31                 | 189               |
| 2                              | 2.47               | 44                    | 137                  | 35                 | 1985              |
| 3                              | 2.12               | 7.8                   | 129                  | 13                 | 6613              |
| 4                              | 1.87               | 4.7                   | 176                  | 19                 | 7710              |
| 5                              | 1.45               | 2.1                   | 254                  | 23                 | 9394              |
